# Supplementary material for: Tinnitus and Headache
Source: Biomed Res Int. 2015 Oct 25;2015:797416. doi: 10.1155/2015/797416 (PMC4637068; doi:10.1155/2015/797416)
Supplement: Supplementary file 1 — Supplementary Material: Additional questions asked to the patients about the relationship between tinitus and headache [file 797416.f1.pdf]

**Supplementary Material**

**Questions about headaches**

25) On how many **days** per month are you perceiving **headaches**?

On about \_\_\_\_\_ days/month

26) Which **pain medication** are you taking because of your headaches?

Primary medication (1): \_\_\_\_\_

Secondary medication (2): \_\_\_\_\_

27) On **how many days per month** are you taking these medications?

medication **1** on about \_\_\_\_ days/month

medication **2** on about \_\_\_\_ days/month

**Questions about the relationship between tinnitus and headache**

28 ) Is your headache on one or predominantly one-sided ?

☐ Yes ☐ No

If so, which side : ☐ right ☐ left

Is your tinnitus unilateral or predominantly one-sided ?

☐ Yes ☐ No

If so, which side : ☐ right ☐ left

29 ) Did your headaches start earlier than the tinnitus

☐ Yes ☐ No ( If no, go to question 30 )

In which year did headache and tinnitus start?

Onset of headaches : \_\_\_\_\_

Onset of tinnitus : \_\_\_\_\_

With the onset of tinnitus headaches ☐ got worse ☐ got better ☐ remained unchanged

29 ) Did your tinnitus start earlier than your headaches

☐ Yes ☐ No ( If no, go to question 32 )

In which year did tinnitus and headache start ?

Onset of tinnitus : \_\_\_\_\_

Onset of headaches : \_\_\_\_\_

With the onset of headaches tinnitus ☐ got worse ☐ got better ☐ remained unchanged

31) Is there a relationship between headaches and tinnitus over time?

☐ when the tinnitus is stronger, the headaches are worse ( and vice versa )

☐ when the tinnitus is stronger , the headaches are better ( and vice versa )

☐ no relationship

☐ another relationship
